# Supplementary material
Source: PubMed Central journal article supplement (PMC3898492)
Supplement: jid2013253x1.pdf [file jid2013253x1.pdf]

## Supplementary Material

### 1. Supplementary Data

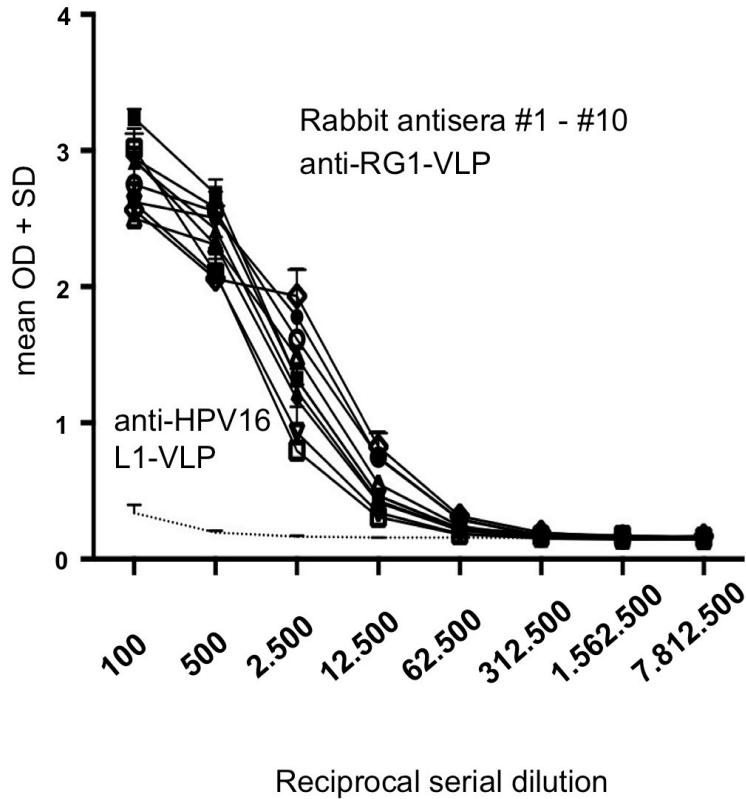

### HPV16 L2 peptide ELISA

Ten NZW rabbits were immunized with either 50 $\mu$ g RG1-VLP, week 0, 4, 6 and 8 (n=6); or 20 $\mu$ g of RG1-VLP, week 0, 3, 6 (n=4) using Alum-MPL adjuvant. Antisera drawn two weeks after the last boost were serially diluted 5-fold and tested in triplicates by ELISA using bacterially expressed HPV16 L2-protein (aa 11-200) as antigen. End-point dilution revealed robust ELISA titers of 2,500-12,000 in all animals vaccinated with RG1-VLP, regardless of immunization scheme. In contrast, a serum from an HPV16 L1-VLP vaccinated animal showed no reactivity against L2. Data are shown as mean OD+SD.

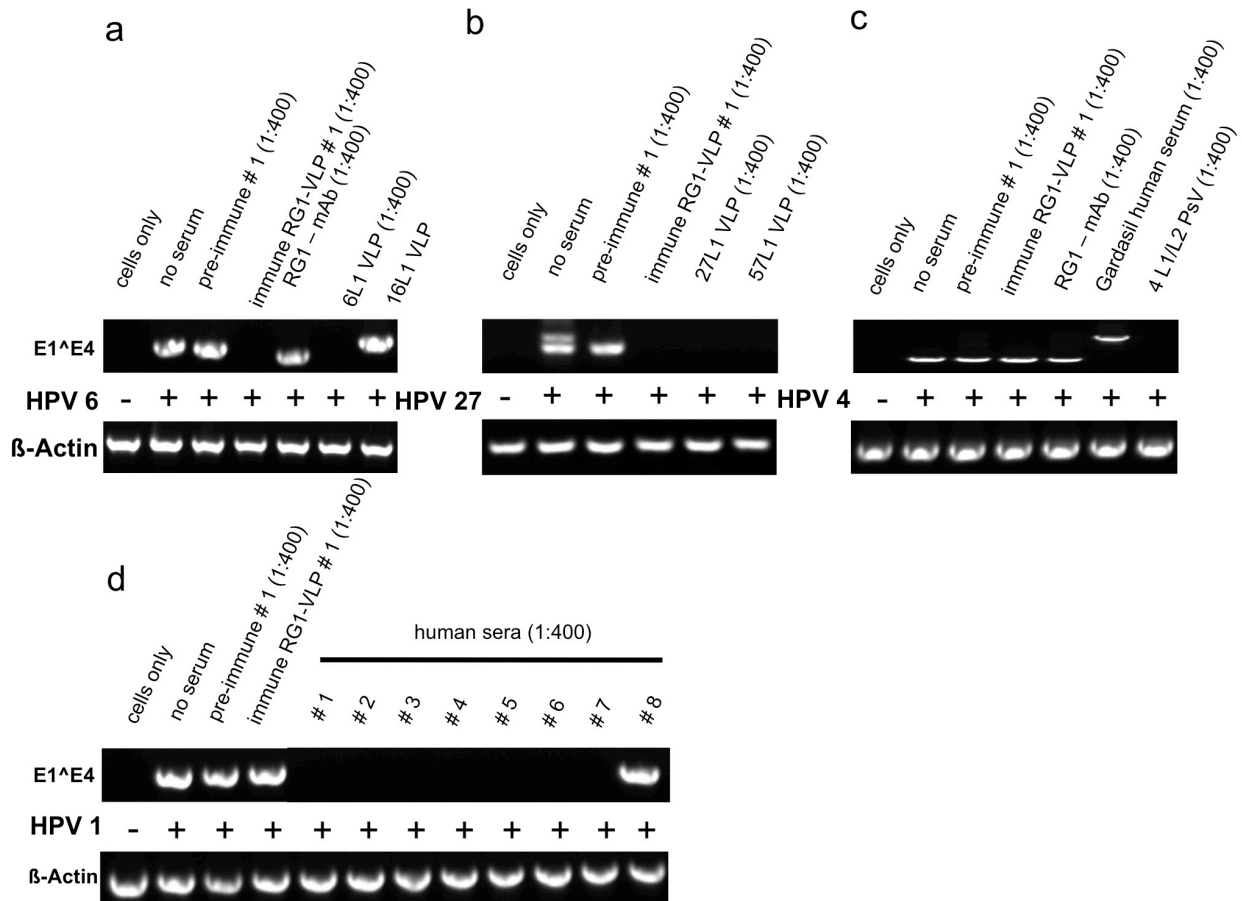

**In vitro RT-PCR neutralization assays using native mucosal Ir HPV6, or cutaneous HPV27, HPV4, or HPV1 virions**

Type-specific neutralizing anti-L1 VLP antisera (HPV6, 27) or anti L1-L2 PsV antiserum (HPV4), were used as respective controls. Sera of 8 pre-pubertal girls (#1-#8) were used as controls in the HPV1 assay, as a type-specific neutralizing serum was not available.

| Immunization                                                                      | Antigen                    |
|-----------------------------------------------------------------------------------|----------------------------|
|  | 1, serum                   |
|  | 2, scrambled peptide       |
|  | 3, SEA                     |
|  | 4, 16L1 (aa 165-173)       |
|  | 5, RG1 (aa 17-36)          |
|  | 6, 16L1 (aa 165-173) + RG1 |

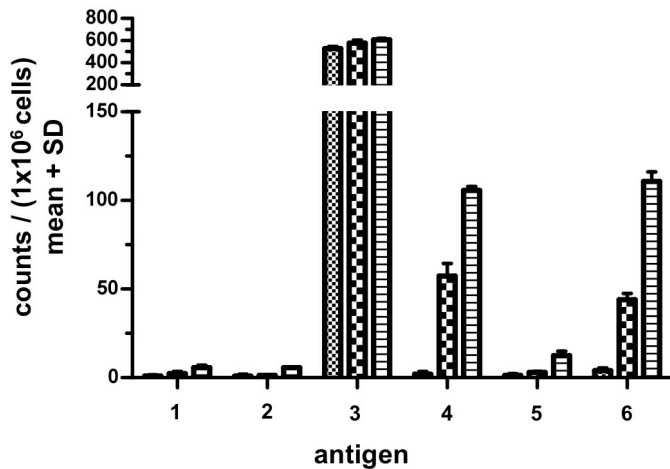

### INF- $\gamma$ ELISPOT assay detecting cytotoxic T-cell responses to vaccination with RG1-VLP

Female C57/BL6 mice (3 x 3) were vaccinated with 2 $\mu$ g of HPV16 L1-VLP, RG1-VLP, or PBS, respectively. Isolated splenocytes were stimulated with serum (1), scrambled peptide (2), SEA (3), HPV16 L1 peptide (aa 165-173) (4), HPV16 L2 RG1 peptide (aa 17-36) (5), or HPV16 L1 plus RG1 peptides combined (6). Spots representing IFN- $\gamma$  producing cells were counted and results expressed as mean number/10<sup>6</sup> cells + SD of triplicate cultures.

| Neutralizing titer (over time) |           |           |           |           |           |           |
|--------------------------------|-----------|-----------|-----------|-----------|-----------|-----------|
| Week<br>(Immunizations)        | # 1       |           |           | # 2       |           |           |
|                                | 10<br>(4) | 52<br>(4) | 54<br>(5) | 10<br>(4) | 52<br>(4) | 54<br>(5) |
| <b>Pseudovirions</b>           |           |           |           |           |           |           |
| HPV 16                         | 100,000   | 1,000     | 100,000   | 100,000   | 1,000     | 100,000   |
| HPV 18                         | 1,000     | 50        | 1,000     | 1,000     | 100       | 1,000     |
| HPV 31                         | 10,000    | 100       | 1,000     | 1,000     | 100       | 10,000    |
| HPV 45                         | 1,000     | <25       | 1,000     | 100       | 100       | 1,000     |
| HPV 52                         | 100       | <25       | 1,000     | 50        | <25       | 50        |
| HPV 58                         | 1,000     | <25       | 10,000    | 1,000     | 100       | 1,000     |
| HPV 6                          | 100       | <25       | 1000      | 50        | <25       | 100       |
| HPV 5                          | 100       | <25       | 1,000     | 50        | <25       | 100       |

**RG1-VLP induced cross-neutralizing antibody titers over time (12 months)**

Two NZW rabbits (#1 and #2) were kept for additional 10 months following the 4th immunization with RG1-VLP in Alum-MPL. Sera were drawn before and two weeks after a 5th injection at week 52 with 50µg of antigen plus Alum-MPL, and tested by PBNA for indicated types. Serum titers are shown and compared to sera obtained at week 10 as indicated.

## **2, Supplementary Methods**

### **Enzyme-linked Immunosorbent Assays (ELISA)**

L2-specific serum titers were determined using His-tagged HPV16 L2 aa 11-200 polypeptide as ELISA antigen (Schellenbacher *et al.*, 2009).

### **Pseudovirion-based Neutralization Assay (PBNA)**

Production of PsV and PsV-based neutralization assays (PBNA) were carried out as described (<http://home.ccr.cancer.gov/lco/protocols.asp>) with minor modifications (Schellenbacher *et al.*, 2009).

### **Pseudovirion (PsV) Plasmids**

Packaging plasmids for HPV16, 18, 45, 5, 6 and BPV were provided by J. Schiller, NIH, Bethesda (plasmid maps and references: <http://home.ccr.cancer.gov/Lco/plasmids.asp>); HPV31, 52 and 58 by T. Kanda, NIID, Tokyo (Kondo *et al.*, 2008), HPV11 (Mossadegh *et al.*, 2004) by M. Müller, DKFZ, Heidelberg.

Plasmids for HPV38 (Faust *et al.*, 2010) and HPV3, 32, 33, 68, 76 (Faust *et al.*, 2013) were provided by J. Dillner, Karolinska Institutet, Stockholm; HPV18, 45, 31, 33, 52, 58, 35, 39, 51, 56, 59, 73, 68, 26, 53, 66, 34, 69, 70 by R. Roden, JHU, Baltimore (manuscript in preparation, Kwak *et al.*); HPV4 PsV were generated by codon modification of NCBI reference sequence NC001457.1 as described by Buck *et al.* (<http://home.ccr.cancer.gov/lco/codonmodification.htm>). "As-different-as-possible" altered L1 and L2 sequences were synthesized (Invivogen) and cloned into expression vector pVITRO1-neo-mcs. For PsV plasmids of HPV5, 6, 11, 16, 18, 31, 45, 52, 58 and CRPV) one may be referred to Schellenbacher *et al.* (Schellenbacher *et al.*, 2009).

Target Plasmids: pYSEAP (encoding for secreted-alkaline phosphatase) and pCLucf (encoding firefly luciferase) were generously provided by J. Schiller and C. Buck, NIH, Bethesda.

### **Enzyme-Linked Immuno Spot (ELISPOT) assays**

C57BL/6 mice (3 groups of 3) were primed (day 0) and boosted (day 10) s.c. with 2 $\mu$ g HPV16 L1-VLP, RG1-VLP, or PBS control. Spleens and sera were isolated day 20. Splenic single-cell suspensions were obtained by mechanical dissociation and 10<sup>6</sup> cells/well added onto 96-well plates with nitrocellulose base (Millipore), pre-coated with interferon-gamma (IFN- $\gamma$ ) capture antibody. Cells were incubated for 24 hours in the presence of serum (1), 5 $\mu$ M scrambled control peptide (YVRFQRLEHHHHHH) (2), 2  $\mu$ g/ml *S. aureus* enterotoxin A (SEA) (Sigma) (3), 5 $\mu$ M HPV16L1 peptide aa 165-173 (AGVDNRECI, a described CTL epitope (Ohlschlager *et al.*, 2003)) (4), 5 $\mu$ M RG1 peptide (QLYKTCKQAGTCCPPDIIPKV) (5), or 2,5 $\mu$ M HPV16L1 plus 2,5 $\mu$ M RG1 peptides combined (6) (Severn Biotech). Following addition of biotinylated anti-IFN- $\gamma$  mAb and avidin-HRP, spots representing IFN- $\gamma$  producing cells of duplicate cultures were counted (mean + SD).

## RT-PCR Primer Pairs

outside: upstream (UO), downstream (DO); inside: upstream (UI), downstream (DI)

### 1. HPV1

UO: 5' -GATCTGGGCAAAGCAACTC-3'

DO: 5' -GCTTCCTGTGCCTATTGCGAG-3'

UI: 5' -GCACTACCTATCCTCTCGG-3'

DI: 5' -CGATTGACCGTCCTCGCGG-3'

### 2. HPV2

UO: 5' -CTCTTGTCAGGAACTCTGTACG-3'

DO: 5' -GGGTGGTAACTACCTGCTG-3'

UI: 5' -CCCACCCGCCAGTGCCAC-3'

DI: 5' -CAGAACCGTCCGGCTGGTGG-3'

### 3. HPV4

UO: 5' -GCGTCTCTTTGGTCAGTGCTATC-3'

DO: 5' -GAGTCGGTGGTTCCATTTAG-3'

UI: 5' -GTGAGCAATCTCCAACCCAGTTC-3'

DI: 5' -CATTGTATGCTGCTGAGCTCG-3'

### 4. HPV6

UO: 5' -CGGGACAGTAACACACAAGTAGAG-3'

DO: 5' -TGCAACAGCTTCTGTTGGGAACAC-3'

UI: 5' -G TTCCTGCAGCTATTTGTACAGG-3'

DI: 5' -ACATAGTGTGTCCCATCTGCG-3'

#### 5. HPV26

UO: 5' -GGTCACTACTCGTGTCC-3'

DO: 5' -GGAAGACGTGTCCTTGG-3'

UI: 5' -GTGATGGCCTCCACTTG-3'

DI: 5' -GCCATCAGTGTGCTGC-3'

#### 6. HPV27

UO: 5' -CACTGGTGTACCACACTGTCAC-3'

DO: 5' -GCCTACGGGGTGGTAACAAC-3'

UI: 5' -CACGTGGAGGACACCCTGTC-3'

DI: 5' -GTGCGGACCAGAAGACATAAG-3'

#### 7. HPV40

UO: 5' -GGCGTGCGTGTCTGTCT-3'

DO: 5' -GGGCACATTACATATAGTGT-3'

UI: 5' -TGCCCACAGTAGTGGTGAT-3'

DI: 5' -CCCCAACTGTGCAGCTACA-3'



### 3, L2 RG1 Epitope AA Sequence Homology

| <b>L2 (RG1) homology motifs<br/>(RG1*: HPV16 L2 aa 17-36)</b> | <b>PV</b>      | <b>Homology with RG1 (%)</b> | <b>Neutralization by antiserum to RG1-VLP<br/>(in vitro / in vivo)</b> |
|---------------------------------------------------------------|----------------|------------------------------|------------------------------------------------------------------------|
| QLYKTCKQAGTCCPDIIIPKV*                                        | <b>HPV 16</b>  | 100                          | <b>in vivo</b>                                                         |
| QLYKTCKQAGTCCPDVIPKV                                          | <b>HPV 73</b>  | 95                           | <b>in vivo</b>                                                         |
| QLYKTCKQSGTCCPDIIIPKV                                         | <b>HPV 34</b>  | 95                           | <b>in vivo</b>                                                         |
| DLYRTCKQAGTCCPDVIPKV                                          | <b>BPV 1</b>   | 85                           | <b>in vitro</b>                                                        |
| DLYRTCKQAGTCCPDIIIPR                                          | <b>HPV 2</b>   | 85                           | <b>in vitro</b>                                                        |
| DLYRTCKQAGTCCPDIIIPRL                                         | <b>HPV 27</b>  | 85                           | <b>in vitro</b>                                                        |
| DLYRTCKQAGTCCPDIIIPRV                                         | <b>HPV 57</b>  | 85                           |                                                                        |
| QLYRTCKAAGTCCPDVIPKV                                          | <b>HPV 35</b>  | 85                           | <b>in vivo</b>                                                         |
| QLYQTCKAAGTCCPDVIPKV                                          | <b>HPV 67</b>  | 85                           |                                                                        |
| QLYRTCKAAGTCCPDVIPKV                                          | <b>HPV 3</b>   | 85                           | <b>in vitro</b>                                                        |
| ELYKTCKAAGTCCPDVIPKV                                          | <b>HPV 77</b>  | 85                           |                                                                        |
| QLYRTCKAAGTCCPDVIPKV                                          | <b>HPV 28</b>  | 85                           |                                                                        |
| ELYKTCKVAGTCCPDVIPKV                                          | <b>HPV 29</b>  | 85                           |                                                                        |
| QLYSTCKAAGTCCPDVIPKV                                          | <b>HPV 82</b>  | 85                           |                                                                        |
| QLYQTCKAAGTCCPSDIIIPKV                                        | <b>HPV 44</b>  | 85                           | <b>in vivo</b>                                                         |
| QLYQTCKAAGTCCPSDIIIPKV                                        | <b>HPV 55</b>  | 85                           |                                                                        |
| DLYKTCKQSGTCCPDVVPKV                                          | <b>HPV 18</b>  | 80                           | <b>in vivo</b>                                                         |
| QLYRTCKASGTCCPDVIPKV                                          | <b>HPV 117</b> | 80                           |                                                                        |
| QLYRTCKASGTCCPDVIPKV                                          | <b>HPV 94</b>  | 80                           |                                                                        |
| QLYRTCKASGTCCPDVIPKV                                          | <b>HPV 10</b>  | 80                           |                                                                        |
| ELYKTCKQSGTCCPDVINKV                                          | <b>HPV 68</b>  | 80                           |                                                                        |
| DLYRTCKAAGTCCPDVIPKV                                          | <b>HPV 102</b> | 80                           |                                                                        |
| QLYQTCKASGTCCPDVIPKV                                          | <b>HPV 52</b>  | 80                           | <b>in vivo</b>                                                         |
| QLYQTCKASGTCCPDVIPKV                                          | <b>HPV 58</b>  | 80                           | <b>in vivo</b>                                                         |
| DLYKTCKQAGTCCPSDVINKV                                         | <b>HPV 59</b>  | 80                           | <b>in vivo</b>                                                         |
| DLYKTCKAAGTCCPDVIPKI                                          | <b>HPV 69</b>  | 80                           |                                                                        |
| DLYKTCKAAGTCCPDVIPKI                                          | <b>HPV 26</b>  | 80                           | <b>in vivo</b>                                                         |
| QLYQTCKASGTCCPDVIPKV                                          | <b>HPV 42</b>  | 80                           |                                                                        |
| QLYQTCKASGTCCPDVIPKV                                          | <b>HPV 13</b>  | 80                           |                                                                        |

|                      |                |    |                 |
|----------------------|----------------|----|-----------------|
| QLYQTCKLTGTCPDVIPKV  | <b>HPV 6</b>   | 80 | <b>in vivo</b>  |
| QLYQTCKATGTCPDVIPKV  | <b>HPV 11</b>  | 80 | <b>in vitro</b> |
| QLYQTCKATGTCPDVIPKV  | <b>HPV 33</b>  | 80 | <b>in vivo</b>  |
| QLYSTCKAAGTCPDVVNKV  | <b>HPV 51</b>  | 80 | <b>in vivo</b>  |
| HIYQTCKQAGTCPDVIKIV  | <b>HPV 8</b>   | 75 |                 |
| QLYQTCKAAGTCPDVIKIV  | <b>HPV 31</b>  | 75 | <b>in vivo</b>  |
| DLYRTCKQSGTCPDVIKIV  | <b>HPV 45</b>  | 75 | <b>in vivo</b>  |
| QLYQTCKASGTCPDVIKIV  | <b>HPV 32</b>  | 75 | <b>in vitro</b> |
| HIYQTCKQAGTCPDVIKIV  | <b>HPV 5</b>   | 75 | <b>in vitro</b> |
| HIYQTCKQAGTCPDVIKIV  | <b>HPV 8</b>   | 75 |                 |
| NIYRTCKQAGTCPDVIKIV  | <b>HPV 19</b>  | 75 |                 |
| NIYRTCKQAGTCPDVIKIV  | <b>HPV 14</b>  | 75 |                 |
| NIYRTCKQAGTCPDVIKIV  | <b>HPV 20</b>  | 75 |                 |
| NIYRTCKQAGTCPDVIKIV  | <b>HPV 21</b>  | 75 |                 |
| NIYRTCKQAGTCPDVIKIV  | <b>HPV 24</b>  | 75 |                 |
| QLYKTCKLSGTCPDVIKIV  | <b>HPV 66</b>  | 75 |                 |
| DIYKGCKAAGTCPDVIKIV  | <b>HPV 107</b> | 75 |                 |
| QLYQTCKAAGTCPDVVNKV  | <b>HPV 7</b>   | 75 |                 |
| DIYRGCKQAGTCPDVIKIV  | <b>HPV 80</b>  | 70 |                 |
| DIYRGCKQAGTCPDVIKIV  | <b>HPV 17</b>  | 70 |                 |
| NIYRTCKQAGTCPDVLNKV  | <b>HPV 25</b>  | 70 |                 |
| HIYQTCKQAGTCPDVVNKV  | <b>HPV 36</b>  | 70 |                 |
| DIYRGCKQAGTCPDVIKIV  | <b>HPV 37</b>  | 70 |                 |
| NIYRTCKQAGTCPTDVIKIV | <b>HPV 93</b>  | 70 |                 |
| NIYRTCKQAGTCPTDVIKIV | <b>HPV 93</b>  | 70 |                 |
| QLYQTCKQSGTCPDVIKIV  | <b>HPV 53</b>  | 70 |                 |
| DLYRTCKQSGTCPDVKV    | <b>HPV 39</b>  | 70 |                 |
| HIYQTCKQAGTCPDVLNKV  | <b>HPV 12</b>  | 70 |                 |
| HIYQTCKQAGTCPDVVNKV  | <b>HPV 47</b>  | 65 |                 |
| NIYRTCKQAGNCPDVVNKV  | <b>HPV 49</b>  | 65 |                 |
| NIYRTCKAAGTCPDVVNKV  | <b>HPV 92</b>  | 65 |                 |
| NIYRGCKAAGTCPDVIKIV  | <b>HPV 96</b>  | 65 |                 |
| DIYKGCKASGTCPDVIKIV  | <b>HPV 22</b>  | 65 |                 |
| DIYKGCKASGTCPDVLNKV  | <b>HPV 23</b>  | 65 |                 |

|                      |               |    |                 |
|----------------------|---------------|----|-----------------|
| QLYKTCKLSGTCPEDVVNKI | <b>HPV 56</b> | 65 | <b>in vivo</b>  |
| DIYRGCKAAGTCPPDVINKV | <b>HPV 9</b>  | 65 |                 |
| DIYRGCKQAGTCPPDVLNKV | <b>HPV 15</b> | 65 |                 |
| HIYQSCKAAGTCPPDVVNKV | <b>HPV 75</b> | 60 |                 |
| HIYQSCKAAGTCPPDVLNKV | <b>HPV 76</b> | 60 | <b>in vitro</b> |
| DIYRGCKASNTCPPDVINKV | <b>HPV 38</b> | 55 | ∅               |
| DIYPSCKISNTCPPDIQNKI | <b>HPV 1</b>  | 50 | ∅               |
| NLYAKCQLSGNCLPDVKNKV | <b>HPV 4</b>  | 50 | ∅               |

Faust H, Jelen MM, Poljak M, *et al.* (2013) Serum antibodies to human papillomavirus (HPV) pseudovirions correlate with natural infection for 13 genital HPV types. *Journal of clinical virology : the official publication of the Pan American Society for Clinical Virology.*

Faust H, Knekt P, Forslund O, *et al.* (2010) Validation of multiplexed human papillomavirus serology using pseudovirions bound to heparin-coated beads. *The Journal of general virology* 91:1840-8.

Kondo K, Ochi H, Matsumoto T, *et al.* (2008) Modification of human papillomavirus-like particle vaccine by insertion of the cross-reactive L2-epitopes. *Journal of medical virology* 80:841-6.

Mossadegh N, Gissmann L, Muller M, *et al.* (2004) Codon optimization of the human papillomavirus 11 (HPV 11) L1 gene leads to increased gene expression and formation of virus-like particles in mammalian epithelial cells. *Virology* 326:57-66.

Ohlschlager P, Osen W, Dell K, *et al.* (2003) Human papillomavirus type 16 L1 capsomeres induce L1-specific cytotoxic T lymphocytes and tumor regression in C57BL/6 mice. *Journal of virology* 77:4635-45.

Schellenbacher C, Roden R, Kirnbauer R (2009) Chimeric L1-L2 virus-like particles as potential broad-spectrum human papillomavirus vaccines. *Journal of virology* 83:10085-95.
